# Supplementary material for: Endothelial Progenitor Cells as a Potential Biomarker in Interstitial Lung Disease Associated with Rheumatoid Arthritis
Source: MDPI journal article supplement (doi:10.3390/jcm9124098), 2020-12-18
Supplement: s1 [file s1]

**Supplementary**

Table S1. Differences of EPC frequency between RA-ILD<sup>+</sup> patients and the three comparative groups (healthy controls, RA-ILD<sup>-</sup> and IPF patients).

|                                                              | <b>EPC Frequency (Mean ± SD)</b> | <b><i>p</i></b>   |
|--------------------------------------------------------------|----------------------------------|-------------------|
| RA-ILD <sup>+</sup> patients vs healthy controls             | 0.047 ± 0.023 vs 0.019 ± 0.012   | <b>&lt; 0.001</b> |
| RA-ILD <sup>+</sup> patients vs RA-ILD <sup>-</sup> patients | 0.047 ± 0.023 vs 0.030 ± 0.013   | <b>0.003</b>      |
| RA-ILD <sup>+</sup> patients vs IPF patients                 | 0.047 ± 0.023 vs 0.091 ± 0.045   | <b>&lt; 0.001</b> |

EPC: endothelial progenitor cells; RA: rheumatoid arthritis; ILD: interstitial lung disease; IPF: idiopathic pulmonary fibrosis; SD: standard deviation. Significant results are highlighted in bold.
